# Supplementary material for: Concept and benefits of the Inverted Classroom method for a competency-based biochemistry course in the pre-clinical stage of a human medicine course of studies
Source: PubMed Central journal article supplement (PMC5569983; doi:10.3205/zma001108), 2017-08-15
Supplement: JME-34-31-s-001.pdf [file JME-34-31-s-001.pdf]

## Anhang

### Konzeption und Nutzen der *Inverted Classroom*-Methode für eine kompetenzorientierte Biochemie Lehrveranstaltung im vorklinischen Studienabschnitt der Humanmedizin

Susanne J. Kühl<sup>1,\*</sup>, Matthias Toberer<sup>1</sup>, Oliver Keis<sup>2</sup>, Daniel Tolks<sup>3</sup>, Martin Fischer<sup>3</sup> und Michael Kühl<sup>1</sup>

1 Institut für Biochemie und Molekulare Biologie, Universität Ulm, 89081 Ulm

2 Studiendekanat Medizinische Fakultät Ulm, Universität Ulm, 89081 Ulm

3 Institut für Didaktik und Ausbildungsforschung in der Medizin, Ludwig-Maximilians-Universität München, 80336 München

#### \* Korrespondierende Autorin:

Dr. Susanne J. Kühl  
Institut für Biochemie und Molekularbiologie  
Universität Ulm  
Albert-Einstein-Allee 11  
89081 Ulm, Deutschland  
[susanne.kuehl@uni-ulm.de](mailto:susanne.kuehl@uni-ulm.de)

**Zusätzliche Tabelle:** Evaluationsergebnisse im Vergleich der traditionellen versus der *Inverted Classroom* Gruppe aus dem offiziellen Evaluationsbogen der Medizinischen Fakultät Ulm.

| <b>Aussage</b>                                                                                              | <b><i>Inverted Classroom</i> Gruppe</b> |    |                    | <b>Traditionelle Gruppe</b>  |     |                    | <b>p-Werte</b><br>(Vergleich IC- mit traditionellen Gruppe) |
|-------------------------------------------------------------------------------------------------------------|-----------------------------------------|----|--------------------|------------------------------|-----|--------------------|-------------------------------------------------------------|
|                                                                                                             | Mittelwert<br>(Likert-Skala)            | N  | Standardabweichung | Mittelwert<br>(Likert-Skala) | N   | Standardabweichung |                                                             |
| Die Lehrveranstaltung ist gut organisiert.                                                                  | 5,53                                    | 32 | 0,88               | 4,50                         | 187 | 1,35               | <0,001                                                      |
| Die Veranstaltung hat eine gute Gesamtstruktur ("Roter Faden").                                             | 5,44                                    | 32 | 0,84               | 4,24                         | 186 | 1,36               | <0,001                                                      |
| Die gestellten Anforderungen sind adäquat.                                                                  | 5,69                                    | 32 | 0,47               | 4,18                         | 186 | 1,38               | <0,001                                                      |
| Die Lernziele der Lehrveranstaltung sind transparent.                                                       | 5,53                                    | 32 | 0,80               | 3,91                         | 186 | 1,45               | <0,001                                                      |
| Die Relevanz der Lerninhalte wird deutlich.                                                                 | 5,44                                    | 32 | 0,88               | 4,01                         | 186 | 1,49               | <0,001                                                      |
| Ich habe in der Lehrveranstaltung viel gelernt.                                                             | 5,38                                    | 32 | 0,87               | 3,65                         | 186 | 1,50               | <0,001                                                      |
| Die Studierenden werden motiviert, sich aktiv mit den Lerninhalten auseinanderzusetzen.                     | 5,53                                    | 32 | 0,84               | 4,01                         | 187 | 1,54               | <0,001                                                      |
| Die beteiligten Lehrenden können die Lehrveranstaltungsinhalte gut vermitteln.                              | 5,47                                    | 32 | 0,76               | 4,14                         | 186 | 1,63               | <0,001                                                      |
| Die beteiligten Lehrenden gestalten den Unterricht anschaulich (mit praktischen Bezügen, Beispielen, etc.). | 5,78                                    | 32 | 0,49               | 4,11                         | 185 | 1,54               | <0,001                                                      |

# 1 Exemplarische Lernziele zum Thema Aminosäuren und Proteine

## Lernziele Hauptvorlesung Biochemie 1. Semester

**Thema:** Aminosäuren und Proteine

**Dozent:** Prof. Dr. Michael Kühl

Theoretische Inhalte in blau

Methodische Inhalte in olive

Medizinische Relevanz/Krankheitsbilder in rot

Kompetenzstufen in schwarz (Details siehe Datei „Definition der Kompetenzstufen“)

**Nach Besuch der Vorlesungsreihe sollten die Studierenden in der Lage sein, .....**

**1. die Klassifizierung, die Struktur und die Eigenschaften von AS zu erläutern.**

Theoretische Inhalte: D/L-Nomenklatur, Buchstabencodes für AS, proteinogene und nicht-proteinogene AS, Pufferwirkung von AS, Titrationskurven, Isoelektrischer Punkt.

Kompetenzstufe: 2

**2. den isoelektrischen Punkt einer Aminosäure mit potentiell geladenen Seitenketten zu berechnen.**

Kompetenzstufe: 2

**3. die Peptidbindung zu erläutern.**

Theoretische Inhalte: Bildung, Doppelbindungscharakter, cis/trans-Konfiguration von Peptidyl-Prolyl-Bindungen.

Kompetenzstufe: 2

**4. den Aufbau, die Funktion und die Eigenschaften von Peptiden und Proteinen zu erläutern.**

Theoretische Inhalte: Primärstruktur, Sekundärstrukturen mit  $\alpha$ -Helix,  $\beta$ -Faltblatt,  $\beta$ -Turn und den stabilisierenden Bindungen, Tertiärstruktur mit den stabilisierenden Bindungen, Proteinmotiv, Proteindomäne, Quartärstruktur: Untereinheiten.

Kompetenzstufe: 2

5. **den Prozess der Proteinfaltung zu erläutern. Die Studierenden sollten Erkrankungen die Proteinfaltung betreffend nennen und deren biochemischen Hintergrund auf die jeweiligen Erkrankungen anwenden können.**

Theoretische Inhalte: Hierarchische Faltung von Proteine; Aufbau, Funktion und Eigenschaften von Chaperonen.

Krankheitsbilder: spongiforme Enzephalopathien (Prionenerkrankung), Amyloidosen

Kompetenzstufe: 3

6. **die Begriffe Denaturierung und Renaturierung zu erklären.**

Theoretische Inhalte: Aufbau, Funktion und Eigenschaften des Proteasoms

Kompetenzstufe: 2

7. **den Prozess und die Funktion der Polyubiquitinierung zu erklären.**

Kompetenzstufe: 2

8. **den Aufbau, die Funktion und die Eigenschaften eines Liganden zu erläutern.**

Theoretische Inhalte: prosthetische Gruppe

Kompetenzstufe: 2

9. **die Interaktion zwischen Ligand und Rezeptor zu erklären.**

Theoretische Inhalte: AS Interaktionen

Kompetenzstufe: 2

10. **die Struktur und Funktion von Myoglobin und Hämoglobin zu erläutern. Die Studierenden sollten Erkrankungen Myoglobin und Hämoglobin betreffend nennen und deren biochemischen Hintergrund auf die jeweiligen Erkrankungen anwenden können.**

Theoretische Inhalte: Konformation, Kooperativität, Allosterie, Hill-Koeffizient, Bohr-Effekt, Unterschied zwischen embryonalem und fetalem Hämoglobin

Krankheitsbilder: CO-Vergiftung, Sichelzellenanämie, Thalassämie

Kompetenzstufe: 3

11. **den Aufbau, die Funktion und die Eigenschaften von  $\alpha$ -Keratin zu erläutern.**

Kompetenzstufe: 2

12. **den Aufbau, die Funktion und die Eigenschaften von Kollagen zu erklären. Die Studierenden sollten Erkrankungen Kollagen betreffend nennen und deren biochemischen Hintergrund auf die jeweiligen Erkrankungen anwenden können.**

Theoretische Inhalte: Tripelhelix

Krankheitsbilder: Skorbut, Ehlers-Danlos-Syndrom, *Osteogenesis imperfecta*.

Kompetenzstufe: 3

**13. für bestimmte Fragestellungen zur Analyse von AS und Proteinen geeignete methodische Verfahren zu nennen und zu erklären.**

Methodische Inhalte: Nachweis von AS mit Ninhydrin, Proteinsequenzierung, SDS-PAGE, Western Blot, ELISA, Röntgenstrukturanalyse, subzelluläre Lokalisation: Antikörper, GFP

Kompetenzstufe: 2

## 2 Seminarbeschreibung

### Integriertes Seminar Modul 6 - Pathobiochemie II: „Vom Gen zum Protein“

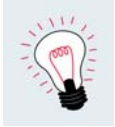

#### Kurzbeschreibung

Das Seminar gibt einen Überblick über die Proteinbiosynthese. Störungen dieses Prozesses resultieren oftmals in schweren Erkrankungen. Im Seminar beziehen wir uns beispielhaft auf die Synthese des Proteins Kollagen Typ I, wobei Störungen in der Kollagensynthese Krankheitsbilder wie *Osteogenesis imperfecta*, Ehlers-Danlos-Syndrom und Skorbut hervorrufen können. Neben der Vermittlung biochemischer Grundlagen sollen zudem Schlüsselkompetenzen wie das Arbeiten in einem Team, die Kommunikation während einer mündlichen Prüfung sowie Gespräche mit Fachkollegen und Patienten gestärkt werden.

#### Dozentin und Lehrbeauftragte

Dr. Susanne Kühn ([susanne.kuehl@uni-ulm.de](mailto:susanne.kuehl@uni-ulm.de))

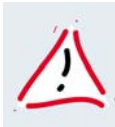

#### Lernziele

##### Inhaltliche Lernziele

Nach der Veranstaltung sollen die Studierenden in der Lage sein,

1. die Proteinbiogenese im Allgemeinen und von Kollagen Typ I im Speziellen zu erläutern.
2. den Aufbau und die Eigenschaften von Kollagen Typ I zu visualisieren.
3. das Krankheitsbild *Osteogenesis imperfecta* (OI) hinsichtlich Klassifizierung, Symptomatik und Schweregrad darzulegen.
4. Vor- und Nachteile diagnostischer und therapeutischer Ansätze zu OI zu erklären.
5. das Ehlers-Danlos-Syndrom und Skorbut hinsichtlich Symptomatik und biochemischen Ursachen zu erläutern.
6. biochemische Hintergründe der drei Krankheitsbilder sowohl vor Experten als auch für Laien verständlich zu beschreiben.

##### Kompetenz-orientierte Lernziele

Während der Veranstaltung wird die Kommunikationsfähigkeit der Studierenden in

1. einem Team (*durch Kleingruppenarbeiten*)
2. mündlichen Prüfungen (*durch Simulation und Feedback*)
3. Diskussionen mit Fachkollegen (*durch Simulation und Feedback*)
4. Gesprächen mit Patienten / Fachfremden (*durch Simulation / Feedback*)

trainiert.

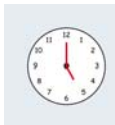

#### Zeitaufwand

Selbstlernphasen: 2x ca. 45 Minuten

Präsenzphasen: 2x 4 Stunden

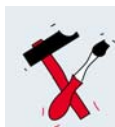

#### Mitzubringendes Material für die Präsenzphasen (Ausdruck oder elektronisch):

- Seminarbeschreibung
- Schreibutensilien
- Biochemie-Lehrbuch
- Arbeitsblätter Vorbereitungsgruppen 1-3
- wenn gewünscht: Präsentationsfolien (werden am Abend vorher auf Moodle online gestellt)

*Notizen für die Evaluation Tag 1:*

*Notizen für die Evaluation Tag 2:*

### 3 Selbstlernaufgaben

#### Aufgaben zu Film 1

Aufgabe 1: Bitte beschriften Sie die Abbildung zur Transkription.

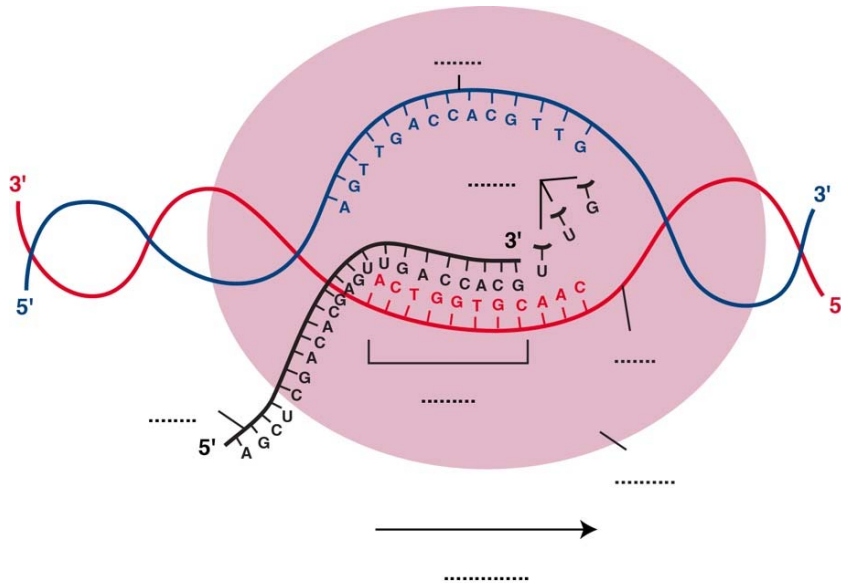

Aufgabe 2: Bitte beschriften Sie die Abbildung zur Translationsinitiation.

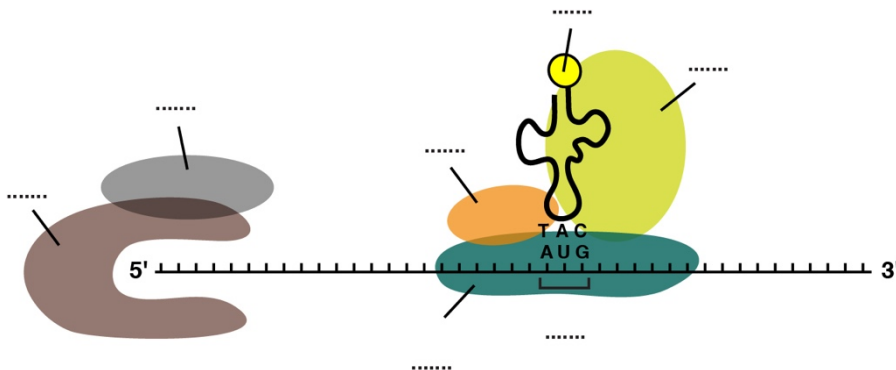

Aufgabe 3: Bitte markieren Sie die (eine) korrekte Aussage in der rechten Spalte mit einem „X“.

|          | Bei der Regulation der Transkription.....                                     |  |
|----------|-------------------------------------------------------------------------------|--|
| <b>A</b> | können die Transkriptionsfaktoren sowohl hemmend als auch aktivierend wirken. |  |
| <b>B</b> | spielen die Faktoren eIF2 und eIF4 eine wichtige Rolle.                       |  |
| <b>C</b> | ist das Startkodon ATG beteiligt.                                             |  |
| <b>D</b> | wirken die cis-regulatorischen Enhancer Elemente hemmend.                     |  |
| <b>E</b> | hat die RNA-Polymerase keine Funktion.                                        |  |



## Aufgaben zu Film 2

Aufgabe 1: Bitte beschriften Sie die Abbildung zur Proteinbiosynthese am rER.

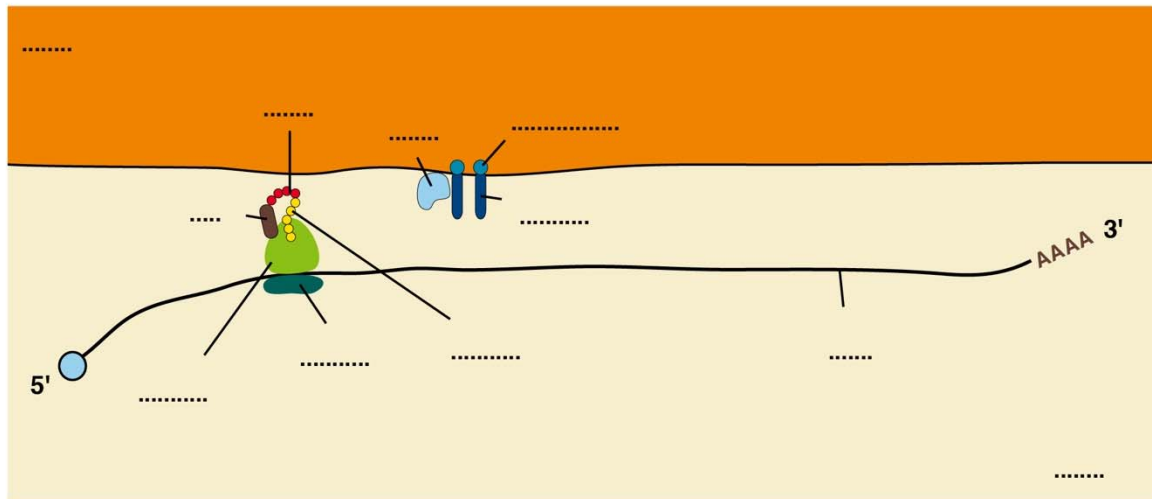

Aufgabe 2: Bitte beschriften Sie die Abbildung zum Vesikeltransport.

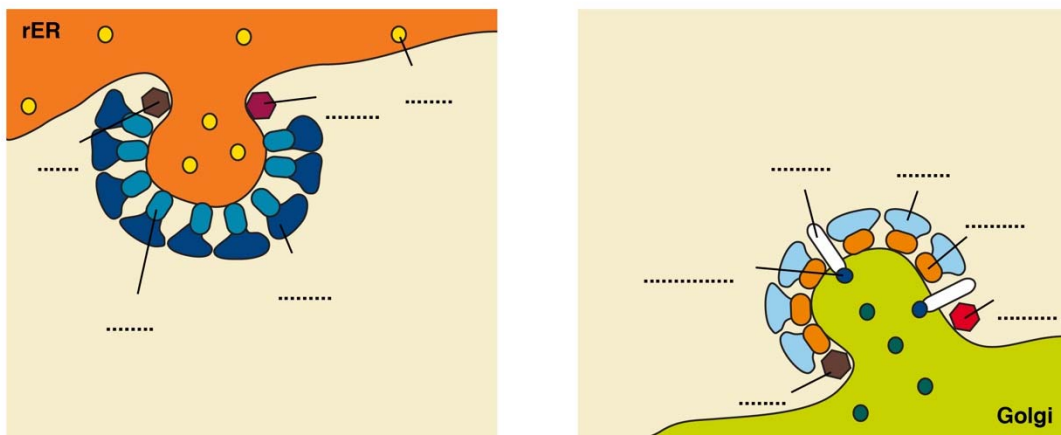

Aufgabe 3: Bitte lösen Sie folgende MC Frage.

Bitte markieren Sie die (eine) Aussage, die **NICHT** korrekt ist, in der rechten Spalte mit einem „X“.

|          |                                                                                              |  |
|----------|----------------------------------------------------------------------------------------------|--|
| <b>A</b> | SRP steht für <i>signal recognition particle</i> .                                           |  |
| <b>B</b> | Chaperone unterstützen die Proteinfaltung im rER.                                            |  |
| <b>C</b> | Die Proteindisulfid-Isomerase sorgt für die korrekte Bildung von Disulfidbrücken im Protein. |  |
| <b>D</b> | Proteine werden an Asparaginreste O-glykosidisch mit Kohlenhydrateinheiten modifiziert.      |  |
| <b>E</b> | Der Golgi-Apparat wird in cis, medianer und trans Golgi unterteilt.                          |  |

## Aufgaben zu Film 3

Aufgabe 1: Bitte beschriften Sie die Abbildung zur Hydroxylierung.

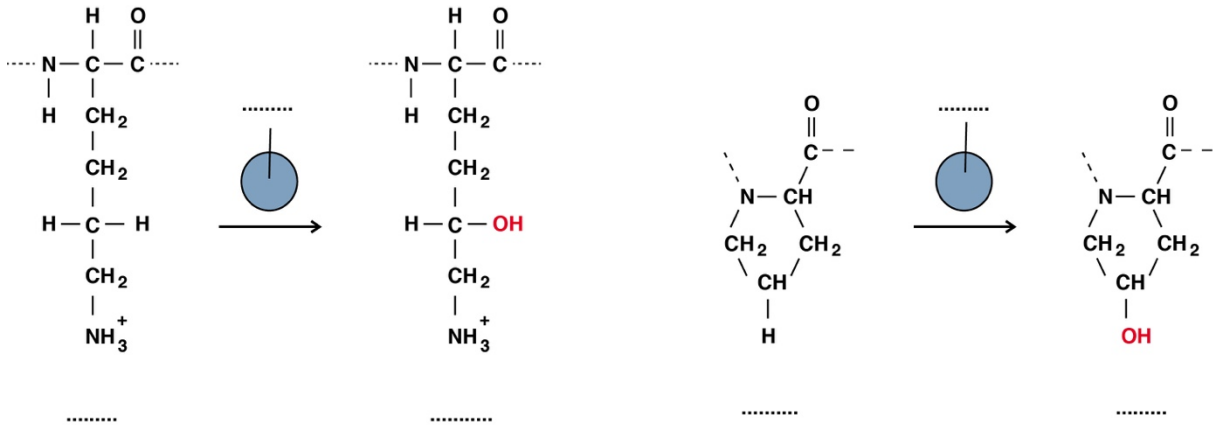

Aufgabe 2: Bitte beschriften Sie die Abbildung zum Kollagen.

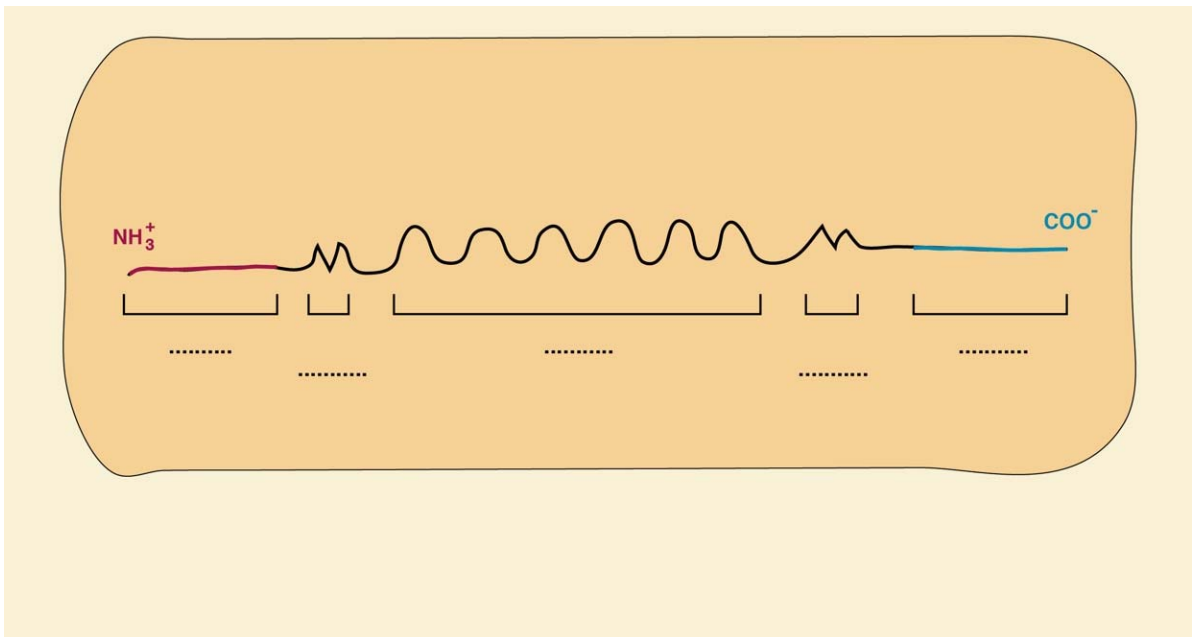

Aufgabe 3: Bitte entscheiden Sie für **JEDE** Aussage, ob sie korrekt ist oder nicht. Markieren Sie dies entsprechend in der rechten Spalte mit einem „X“.

| Bei der Kollagensynthese.....                                                                | korrekt | nicht korrekt |
|----------------------------------------------------------------------------------------------|---------|---------------|
| werden Kohlenhydrate über eine N-glykosidische Bindung an einen Hydroxylsilylrest angehängt. |         |               |
| spielen für die Tripelhelixbildung Disulfidbrücken am N-Propeptid eine entscheidende Rolle.  |         |               |
| katalysieren Peptidasen eine Abspaltung der Propeptide, wodurch Tropokollagen entsteht.      |         |               |
| katalysiert die Lysyloxidase die Umwandlung von Hydroxylysin zu Hydroxyallysin.              |         |               |

## 4 Abläufe der Präsenzphasen

**Zusätzliche Tab. 2:** Ablauf Präsenzphase I. Dargestellt sind die Zeiten inkl. der Dauer der einzelnen Schritte, die Themen, didaktische Methoden, Ziel der jeweiligen didaktischen Methoden, Kompetenzen sowie Kompetenz- und Arzttrollen nach NKLM und die Kompetenzebenen nach Bloom, 1984.

| Zeit        | Thema                                                                                                                                                                                                           | Didaktische Methode                                                                                    | Ziel der didaktischen Methode                                                                                  | ICAP                                   | Kompetenz / Medizinisches Wissen                                        | Kompetenz- / Arzttrollen               | Kompetenzebenen (Bloom, 1984)    |
|-------------|-----------------------------------------------------------------------------------------------------------------------------------------------------------------------------------------------------------------|--------------------------------------------------------------------------------------------------------|----------------------------------------------------------------------------------------------------------------|----------------------------------------|-------------------------------------------------------------------------|----------------------------------------|----------------------------------|
| 14:00-14:10 | Begrüßung und Vorschau                                                                                                                                                                                          | Agenda / Lernziele (Flipcharts an der Wand)                                                            | Übersicht des Tagesablauf                                                                                      |                                        |                                                                         |                                        |                                  |
| 14:10-14:35 | <i>Osteogenesis imperfecta</i> Ursachen Symptome / Diagnose / Therapie (Was fällt Ihnen dazu ein?)                                                                                                              | Gemeinsame Erarbeitung am Flipchart                                                                    | Aktivierung von Vorwissen aus Selbstlernphase I                                                                | aktiv                                  | Prinzipien der Pathogenese und Pathomechanismen                         | Medizinischer Experte                  | Wiedergeben                      |
| 14:35-15:00 | <i>Osteogenesis imperfecta</i> (Biochem. Hintergrund, Klassifizierung und Symptome)                                                                                                                             | Impulsvortrag (Power Point)                                                                            | Informationsvermittlung mit Aktivierung                                                                        | passiv                                 | Prinzipien der Pathogenese und Pathomechanismen                         | Medizinischer Experte                  | Verstehen                        |
| 15:10-15:15 | Erläuterung und Ausgabe der Gruppenarbeiten                                                                                                                                                                     | Prüfungsrelevante Themen mit klarer Aufgabenstellung                                                   | Gruppen im Vorfeld durch Dozentin eingeteilt                                                                   | passiv                                 |                                                                         |                                        |                                  |
| 15:15-15:55 | Gruppe 1: Transkription<br>Gruppe 2: Translation<br>Gruppe 3: Synthese ins ER<br>Gruppe 4: Vesikeltransport<br>Gruppe 5: Synthese Kollagen-Tripelhelix Teil 1<br>Gruppe 6: Synthese Kollagen-Tripelhelix Teil 2 | Gruppenarbeit (Aufgabenstellung ähnlich einer mündlichen Prüfung: grafische Darstellung auf Flipchart) | Aktivieren und Vertiefen von biochemischem Grundlagenvorwissen aus Selbstlernphase I und Vorlesung 1. Semester | konstruktiv                            | Prinzipien normaler Struktur und Funktion                               | Medizinischer Experte Mitglied im Team | Anwenden                         |
| 15:55-16:10 | Pause                                                                                                                                                                                                           |                                                                                                        |                                                                                                                |                                        |                                                                         |                                        |                                  |
| 16:10-17:15 | Gruppenthemen siehe oben                                                                                                                                                                                        | Simulation einer Prüfung (6x) mit Feedbackbogen                                                        | Anwenden der biochemischen Grundlagen                                                                          | transaktiv                             | Prinzipien normaler Struktur und Funktion                               | Medizinischer Experte Kommunikator     | Anwenden                         |
| 17:15-17:45 | Ursache, Schweregrad und Diagnostik von OI (anhand eines klinischen Falls)                                                                                                                                      | Interaktiver Vortrag (Power Point mit integrierten Aufgaben und Diskussion)                            | Informationsvermittlung mit Aktivierung Anwenden, vertiefen der biochemischen Grundlagen                       | passiv, aktiv, konstruktiv, transaktiv | Prinzipien der Pathogenese und Pathomechanismen Diagnostische Verfahren | Medizinischer Experte Kommunikator     | Verstehen, Anwenden, Analysieren |
| 17:45-18:00 | Tagesevaluation und Abschluss                                                                                                                                                                                   | Evaluationsbogen                                                                                       |                                                                                                                |                                        |                                                                         |                                        |                                  |

Abkürzungen: ICAP, *interactive, constructive, active, passive*; OI, *Osteogenesis imperfecta*

**Zusätzliche Tab. 3:** Ablauf Präsenzphase II. Dargestellt sind die Zeiten inkl. der Dauer der einzelnen Schritte, die Themen, didaktische Methoden, Ziel der jeweiligen didaktischen Methoden, Kompetenzen sowie Kompetenz- und Arzttrollen nach NKLM und die Kompetenzebenen nach Bloom, 1984.

| Zeit        | Thema                                                                                                                     | Didaktische Methode                                                                                                                          | Ziel der didaktischen Methode                                                            | ICAP                                   | Kompetenz / Medizinisches Wissen                                                                  | Kompetenz- / Arzttrollen                                      | Kompetenzebenen (Bloom, 1984)    |
|-------------|---------------------------------------------------------------------------------------------------------------------------|----------------------------------------------------------------------------------------------------------------------------------------------|------------------------------------------------------------------------------------------|----------------------------------------|---------------------------------------------------------------------------------------------------|---------------------------------------------------------------|----------------------------------|
| 14:00-14:15 | Begrüßung, Evaluation, Vorschau                                                                                           | Evaluationsfragen Filme Agenda / Tageslernziele (Flipcharts an Wand)                                                                         | Übersicht des Tagesablauf                                                                |                                        |                                                                                                   |                                                               |                                  |
| 14:15-14:45 | Ursache, Schweregrad, Diagnostik und Therapie von OI (anhand eines klinischen Falls)                                      | Interaktiver Vortrag (Power Point mit integrierten Aufgaben und Diskussion)                                                                  | Informationsvermittlung mit Aktivierung Anwenden, vertiefen der biochemischen Grundlagen | passiv, aktiv, konstruktiv, transaktiv | Prinzipien der Pathogenese und Pathomechanismen Diagnostische Verfahren Therapeutische Prinzipien | Medizinischer Experte Kommunikator                            | Verstehen, Anwenden, Analysieren |
| 14:45-15:15 | Ehlers-Danlos-Syndrom / Skorbut (Biochem. Hintergrund, Klassifizierung und Symptome)                                      | Impulsvortrag (Power Point)                                                                                                                  | Informationsvermittlung mit Aktivierung                                                  | passiv                                 | Prinzipien der Pathogenese und Pathomechanismen                                                   | Medizinischer Experte                                         | Verstehen                        |
| 15:15-15:20 | Erläuterung der Gruppenarbeit                                                                                             | Aufgaben mit Szenarien aus späterem Berufsleben                                                                                              |                                                                                          |                                        |                                                                                                   |                                                               |                                  |
| 15:20-15:40 | Gruppe 1 / 2: OI (Experte / Laie)<br>Gruppe 3 / 4: EDS (Experte / Laie)<br>Gruppe 5 / 6: Skorbut (Experte / Laie)         | Gruppenarbeit Diskussion                                                                                                                     | Aktivieren und Vertiefen des gesamten Stoffes                                            | konstruktiv                            | Prinzipien der Pathogenese und Pathomechanismen                                                   | Medizinischer Experte Mitglied im Team Kommunikator           | Anwenden                         |
| 15:40-15:55 | Pause                                                                                                                     |                                                                                                                                              |                                                                                          |                                        |                                                                                                   |                                                               |                                  |
| 15:55-16:40 | Gegenseitige Erläuterung: Gruppe 1+2: OI (Experte/Laie) Gruppe 3+4: EDS (Experte/Laie) Gruppe 5+6: Skorbut (Experte/Laie) | Gruppenarbeit Erläuterung und Diskussion Wahl des Rollenspiels Interne Aufgabenverteilung                                                    | Anwenden und vertiefen des gesamten Stoffes                                              | transaktiv                             | Prinzipien normaler Struktur und Funktion Prinzipien der Pathogenese und Pathomechanismen         | Medizinischer Experte Kommunikator Ärztliche Gesprächsführung | Analysieren                      |
| 16:40-16:40 | Vorstellung der Gruppenarbeit (3 aus 6 Themen)                                                                            | Rollenspiele vor Plenum: Gespräch zwischen Arzt (Studierende) und Experte / Laie (Dozierende)<br>Zuhörer: Fragebogen<br>Diskussion im Plenum | Anwenden und vertiefen des gesamten Stoffes                                              | transaktiv                             | Prinzipien normaler Struktur und Funktion Prinzipien der Pathogenese und Pathomechanismen         | Medizinischer Experte Kommunikator Ärztliche Gesprächsführung | Analysieren                      |
| 17:40-18:00 | Evaluation Wissenstest Abschluss                                                                                          | Evaluationsfragen Gesamtveranstaltung Lernkontrolle                                                                                          | Feedback Feststellung des Wissenserwerb                                                  | aktiv                                  |                                                                                                   |                                                               |                                  |

Abkürzung: EDS, Ehlers-Danios-Syndrom; ICAP, *interactive, constructive, active, passive*; OI, *Osteogenesis imperfecta*

## 5 Exemplarische Aufgaben der Präsenzphasen I und II

### 5.1 Exemplarische Aufgabe der Präsenzphase I

#### Arbeitsauftrag „Prüfungssimulation“, Prüfung 1

Arbeitsgruppenmitglieder:

.....

Sie befinden sich in der mündlichen M1 Prüfung. Ihr Biochemie Prüfer stellt Ihnen die Aufgabe, die Transkription inklusive deren Regulation zu erläutern. Papier und Stifte liegen vor. Bitte versuchen Sie heute, diese Thematik auf einem Flipchart zu skizzieren. Im Anschluss wird einer aus der Gruppe die Gelegenheit bekommen, das Thema anhand des Flipcharts in ca. 5 Minuten wie in einer Prüfung vorzustellen.

*Inhalte in Stichpunkten:*

- Promotor mit cis-regulatorischen Elementen, TATA Box und Transkriptionsstartpunkt
- Transkriptionsfaktoren, RNA-Polymerase
- Transkription mit RNA-Polymerase, Matrizen und Template DNA-Strang, hnRNA, Lese- und Syntheserichtung, Nukleotide

#### **Phase 1: Die Vorbereitung**

- Bitte überlegen Sie in der Gruppe, wie Sie diese Aufgabe in einer Prüfung lösen würden. Bereiten Sie ein Flipchart mit den wichtigsten Fakten und Prozessen vor. Beachten Sie dabei folgendes:
  - o Geben Sie eine Übersicht der Inhalte (z.B. Wozu dient der Prozess? Was passiert in diesem?).
  - o Kommen Sie dann vom Großen zum Kleinen (z.B. Was wird dafür benötigt? Wie verläuft der Prozess?).
  - o Visualisieren Sie die wichtigsten Fakten und komplizierten Prozesse.
  - o Erläutern Sie nur wenige Inhalte, die Sie nicht visualisieren.
  - o Beschreiben Sie alle Inhalte, ob visualisiert oder nicht, nachvollziehbar.
  - o Sprechen Sie möglichst frei (kein Ablesen).
- Wählen Sie einen aus der Gruppe, der die Rolle des „Prüflings“ in der Prüfungssimulation übernimmt.
- Dauer: 30 min

#### **Phase 2: Die Prüfungssimulation**

- Eine Person aus der Gruppe wird in die Rolle des Prüflings schlüpfen.
- Ihre Dozentin wird die Biochemie-Prüferin darstellen und als Ausgangsfrage oben genannte Frage stellen.
- Versuchen Sie, die Antwort auf diese relativ offene Frage strukturiert darzulegen.

- Seien Sie darauf eingestellt, das – wie in einer realen Prüfung – Zwischenfragen gestellt werden können.

## 5.2 Exemplarische Aufgaben der Präsenzphase II

### Arbeitsauftrag „Expertengruppe“ *Osteogenesis imperfecta*

„Expertengruppe“:

.....

Tandemgruppe:

.....

**Klinisches-wissenschaftliches Szenario:**

Sie befinden sich auf einem wissenschaftlichen Kongress und stellen in einem Fachvortrag Ihre neuesten Daten auf dem Gebiet der *Osteogenesis imperfecta* Forschung dar. Sie konnten eine bis dato unbekannte Mutation im *COL1A1* Gen (im N-Terminus der Kollagen- $\alpha$ -Kette) identifizieren, welche *Osteogenesis imperfecta* Typ IV auslöst. Im Anschluss an Ihren Vortrag kommt eine Kollegin auf Sie zu, der sich von Ihnen den allgemeinen biochemischen Hintergrund von *Osteogenesis imperfecta* erläutern lässt.

#### Phase 1: Die Vorbereitung

- Bitte diskutieren Sie in den nächsten 25 Minuten in Ihrer Kleingruppe, wie Sie dabei vorgehen würden.
- Im Anschluss treffen Sie sich mit Ihrer Tandemgruppe.

#### Phase 2: Die Vorstellung vor der Tandemgruppe

- Stellen Sie Ihrer Tandemgruppe das Szenario vor.
- Einer von Ihrer Gruppe darf nun in die Rolle des Forschers schlüpfen und in ca. 5-10 Minuten vor Ihrer Tandemgruppe die Erläuterung des Experten vornehmen.
- Ihre Tandemgruppe wiederum simuliert in ebenfalls 5-10 Minuten deren Szenario.
- Bitte entscheiden Sie, welche der beiden Szenarien Sie im Anschluss an der Tafel simulieren wollen.
- Wählen Sie zwei aus der Gruppe, die verschiedenen Rollen übernehmen.

#### Phase 3: Die Simulation

- Eine Person aus der Gruppe wird in die Rolle des Forschers oder Kinderarztes schlüpfen.
- Eine zweite Person wird die Rolle der Kollegin oder der Mutter übernehmen.
- Dauer: 5 Minuten

*Beachten Sie bei der Simulation folgendes:*

- Geben Sie eine Übersicht der Inhalte (z.B. Wozu dient der Prozess? Was passiert dabei?).

- Kommen Sie dann vom Großen zum Kleinen (z.B. Was wird benötigt? Wie verläuft der Prozess?).
- Visualisieren Sie die wichtigsten Fakten und komplizierten Prozesse.
- Erläutern Sie nur wenige Inhalte, die Sie nicht visualisieren.
- Beschreiben Sie alle Inhalte, ob visualisiert oder nicht, nachvollziehbar.
- Sprechen Sie möglichst frei (kein Ablesen).
- Überlegen Sie sich außerdem, was die Kollegin oder Mutter konkret fragen könnte. Seien Sie kreativ, aber bleiben Sie realistisch.

## Arbeitsauftrag „Laiengruppe“ *Osteogenesis imperfecta*

### „Laiengruppe“:

....

### Tandemgruppe:

....

### Klinisches Szenario:

Sie sind Kinderarzt. Eine Mutter sucht Sie mit ihrer 5-jährigen Tochter aufgrund eines fiebrigen Infekts auf. Ihnen fällt auf, dass das Kind einen Gips am rechten Unterarm trägt. Sie erinnern sich, dass das Kind bei einem der letzten Besuche ebenfalls einen Gips getragen hat, damals aber am rechten Bein. Bei Nachfrage bestätigt Ihnen das die Mutter und erzählt außerdem, dass das Mädchen in den letzten zwei Jahren insgesamt fünf Knochenbrüche erlitten hat. Weitere Untersuchungen zeigen, dass das Kind vermutlich nicht misshandelt wurde. Ihre Verdachtsdiagnose lautet *Osteogenesis imperfecta Typ I*, welche durch Ihre Untersuchungen bestätigt wird. Sie klären die Mutter über die Krankheit auf, schildern deren biochemischen Hintergrund anhand einer einfachen Skizze, wobei Sie auch die Ursache für die Unheilbarkeit erläutern.

### Phase 1: Die Vorbereitung

- Bitte diskutieren Sie in den nächsten 25 Minuten in Ihrer Kleingruppe, wie Sie dabei vorgehen würden.
- Im Anschluss treffen Sie sich mit Ihrer Tandemgruppe.

### Phase 2: Die Vorstellung vor der Tandemgruppe

- Stellen Sie Ihrer Tandemgruppe das Szenario vor.
- Einer von Ihrer Gruppe darf nun in die Rolle des Kinderarztes schlüpfen und in ca. 5-10 Minuten vor Ihrer Tandemgruppe die Erläuterung des Arztes vornehmen.
- Ihre Tandemgruppe wiederum simuliert in ebenfalls 5-10 Minuten deren Szenario.
- Bitte entscheiden Sie, welche der beiden Szenarien Sie im Anschluss an der Tafel simulieren wollen.
- Wählen Sie zwei aus der Gruppe, die verschiedenen Rollen übernehmen.

### **Phase 3: Die Simulation**

- Eine Person aus der Gruppe wird in die Rolle des Forschers oder Kinderarztes schlüpfen.
- Eine zweite Person wird die Rolle der Kollegin oder der Mutter übernehmen.
- Dauer: 5 Minuten

#### *Beachten Sie bei der Simulation folgendes:*

- Geben Sie eine Übersicht der Inhalte (z.B. Wozu dient der Prozess? Was passiert dabei?).
- Kommen Sie dann vom Großen zum Kleinen (z.B. Was wird benötigt? Wie verläuft der Prozess?).
- Visualisieren Sie die wichtigsten Fakten und komplizierten Prozesse. Im Laiengespräch: Nehmen Sie Bezüge zu Alltäglichem.
- Erläutern Sie nur wenige Inhalte, die Sie nicht visualisieren.
- Beschreiben Sie alle Inhalte, ob visualisiert oder nicht, nachvollziehbar.
- Sprechen Sie möglichst frei (kein Ablesen).
- Überlegen Sie sich außerdem, was die Kollegin oder Mutter konkret fragen könnte. Seien Sie kreativ, aber bleiben Sie realistisch.



## 6 Wissenstest Präsenzphase O und II

### Aufgabe 1

Bitte markieren Sie die (eine) korrekte Aussage in der rechten Spalte mit einem „X“.

|                                       |                                                                               |  |
|---------------------------------------|-------------------------------------------------------------------------------|--|
|                                       | Bei der Regulation der Transkription.....                                     |  |
| <b>A</b>                              | können die Transkriptionsfaktoren sowohl hemmend als auch aktivierend wirken. |  |
| <b>B</b>                              | spielen die Faktoren eIF2 und eIF4 eine wichtige Rolle.                       |  |
| <b>C</b>                              | ist das Startkodon ATG beteiligt.                                             |  |
| <b>D</b>                              | wirken die cis-regulatorischen Enhancer Elemente hemmend.                     |  |
| <b>E</b>                              | hat die RNA-Polymerase keine Funktion.                                        |  |
| Punkte (von der Dozentin auszufüllen) |                                                                               |  |

Max.1 Punkt

### Aufgabe 2

Bitte markieren Sie die (eine) Aussage, die **NICHT** korrekt ist, in der rechten Spalte mit einem „X“.

|                                       |                                                                                              |  |
|---------------------------------------|----------------------------------------------------------------------------------------------|--|
| <b>A</b>                              | SRP steht für <i>signal recognition particle</i> .                                           |  |
| <b>B</b>                              | Chaperone unterstützen die Proteinfaltung im rER.                                            |  |
| <b>C</b>                              | Die Proteindisulfid-Isomerase sorgt für die korrekte Bildung von Disulfidbrücken im Protein. |  |
| <b>D</b>                              | Proteine werden an Asparaginreste O-glykosidisch mit Kohlenhydrateinheiten modifiziert.      |  |
| <b>E</b>                              | Der Golgi-Apparat wird in cis, medianer und trans Golgi unterteilt.                          |  |
| Punkte (von der Dozentin auszufüllen) |                                                                                              |  |

Max.1 Punkt

### Aufgabe 3

Bitte entscheiden Sie für **JEDE** Aussage, ob sie korrekt ist oder nicht. Markieren Sie dies entsprechend in der rechten Spalte mit einem „X“.

| Bei der Kollagensynthese.....                                                               | korrekt | nicht korrekt |
|---------------------------------------------------------------------------------------------|---------|---------------|
| werden Kohlenhydrate über eine N-glykosidische Bindung an einen Hydroxylsylrest angehängt.  |         |               |
| spielen für die Tripelhelixbildung Disulfidbrücken am N-Propeptid eine entscheidende Rolle. |         |               |
| katalysieren Peptidasen eine Abspaltung der Propeptide, wodurch Tropokollagen entsteht.     |         |               |
| katalysiert die Lsyloxidase die Umwandlung von Hydroxylysin zu Hydroxyallysin.              |         |               |
| Punkte (von der Dozentin auszufüllen)                                                       |         |               |

Max. 4 Punkte

## Aufgabe 4

### Klin. Fallvignette:

Sie sind Kinderarzt. Eine Mutter sucht Sie mit ihrer 5-jährigen Tochter aufgrund eines fiebrigen Infekts auf. Ihnen fällt auf, dass das Kind einen Gips am rechten Unterarm trägt. Sie erinnern sich, dass das Kind bei einem der letzten Besuche ebenfalls einen Gips getragen hat, damals aber am rechten Bein. Bei Nachfrage bestätigt Ihnen das die Mutter und erzählt außerdem, dass das Mädchen in den letzten zwei Jahren insgesamt fünf Knochenbrüche erlitten hat. Weitere Untersuchungen zeigen, dass das Kind vermutlich nicht misshandelt wurde.

### Frage 1:

Ihre Verdachtsdiagnose lautet *Osteogenesis imperfecta*. Welche Untersuchungen führen Sie durch, um diese Diagnose zu bestätigen? Bitte markieren Sie in der rechten Spalte jene Untersuchungen, die Sie durchführen sollten, mit einem „X“.

|                                       |                               |  |
|---------------------------------------|-------------------------------|--|
| <b>A</b>                              | Röntgen des Skeletts          |  |
| <b>B</b>                              | MRT der Leber                 |  |
| <b>C</b>                              | Augenärztliche Untersuchungen |  |
| <b>D</b>                              | Echokardiographie des Herzens |  |
| <b>E</b>                              | Erhebung des Zahnstatus       |  |
| Punkte (von der Dozentin auszufüllen) |                               |  |

Max. 3 Punkte

### Frage 2:

Ihre ersten Untersuchungen bestätigen, dass das Mädchen an *Osteogenesis imperfecta* leidet. Um diese Diagnose zu sichern und zu klassifizieren, veranlassen Sie eine DNA-Sequenzierung. Welche Gene sollten Sie sequenzieren lassen? Bitte markieren Sie in der rechten Spalte jene Gene, die Sie sequenzieren lassen sollten, mit einem „X“.

|                                       |                         |  |
|---------------------------------------|-------------------------|--|
| <b>A</b>                              | Elastin Typ 1           |  |
| <b>B</b>                              | Collagen Typ 1 alpha 2  |  |
| <b>C</b>                              | Collagen Typ 10 alpha 1 |  |
| <b>D</b>                              | Collagen Typ 1 alpha 1  |  |
| Punkte (von der Dozentin auszufüllen) |                         |  |

Max. 2 Punkte

### Frage 3:

Die DNA-Sequenzierung ergibt, dass das Kind an *Osteogenesis imperfecta* des Typs I leidet und die Mutter muss darüber informiert werden, dass diese Erkrankung derzeit noch unheilbar ist. Was kann eine biochemische Begründung für die Unheilbarkeit der Erkrankung sein? Bitte markieren Sie die korrekte Aussage in der rechten Spalte mit einem „X“.

|                                       |                                                                                                         |  |
|---------------------------------------|---------------------------------------------------------------------------------------------------------|--|
| <b>A</b>                              | <i>Osteogenesis imperfecta</i> basiert auf einer aktivierende Mutation im Gen für die Lysylhydroxylase. |  |
| <b>B</b>                              | <i>Osteogenesis imperfecta</i> wird durch einen Medikamentenmissbrauch induziert.                       |  |
| <b>C</b>                              | <i>Osteogenesis imperfecta</i> basiert auf Mutationen im <i>Collagen Typ 1 alpha 1</i> Gen.             |  |
| <b>D</b>                              | <i>Osteogenesis imperfecta</i> beruht auf einer Mangelernährung.                                        |  |
| Punkte (von der Dozentin auszufüllen) |                                                                                                         |  |

Max. 1 Punkte

## 7 Evaluationsbögen

### 7.1 Offizieller Evaluationsbogen der Medizinischen Fakultät Ulm

Gezeigt sind nur jene Items, die in dieser Studie ausgewertet wurden. Der Fragebogen wurde online über Moodle für die Studierenden beider Gruppen (traditionell und Inverted Classroom) bereitgestellt.

|                                                                                                                                                                                                                                                                                                                                                                                                                                                                                                                |                                                                                                                                                                                                                                                                               |                                                                                             |
|----------------------------------------------------------------------------------------------------------------------------------------------------------------------------------------------------------------------------------------------------------------------------------------------------------------------------------------------------------------------------------------------------------------------------------------------------------------------------------------------------------------|-------------------------------------------------------------------------------------------------------------------------------------------------------------------------------------------------------------------------------------------------------------------------------|---------------------------------------------------------------------------------------------|
| [SURVEY]                                                                                                                                                                                                                                                                                                                                                                                                                                                                                                       |                                                                                                                                                                                                                                                                               |                                                                                             |
| [ORGANIZATION]                                                                                                                                                                                                                                                                                                                                                                                                                                                                                                 | [SUBUNIT]                                                                                                                                                                                                                                                                     |                                                                                             |
| [AUTHOR]                                                                                                                                                                                                                                                                                                                                                                                                                                                                                                       | [PERIOD]                                                                                                                                                                                                                                                                      |                                                                                             |
| <small>Markierung: <input type="checkbox"/> <input checked="" type="checkbox"/> <input type="checkbox"/> <input type="checkbox"/> Bitte verwenden Sie einen Kugelschreiber oder einen nicht zu starken Filzstift. Dieser Fragebogen wird maschinell erfasst.<br/>Korrektur: <input type="checkbox"/> <input checked="" type="checkbox"/> <input type="checkbox"/> <input type="checkbox"/> Bitte beachten Sie im Interesse einer optimalen Datenerfassung die links gegebenen Hinweise beim Ausfüllen.</small> |                                                                                                                                                                                                                                                                               |                                                                                             |
| <p><b>Liebe Studentinnen und Studenten,</b><br/>bitte schätzen Sie anhand dieses Bogens die von Ihnen besuchte Lehrveranstaltung ein. Die Ergebnisse werden in anonymisierter Form ausgewertet und den Dozierenden zurückgemeldet. Mit Ihrer sorgfältigen Beantwortung der Fragen unterstützen Sie die Bemühungen um eine effektive Lehre an der Medizinischen Fakultät Ulm.<br/><b>Vielen Dank für Ihre Mithilfe.</b></p>                                                                                     |                                                                                                                                                                                                                                                                               |                                                                                             |
| <b>Organisation, Struktur und Aufbau der Lehrveranstaltung</b>                                                                                                                                                                                                                                                                                                                                                                                                                                                 |                                                                                                                                                                                                                                                                               |                                                                                             |
| Die Lehrveranstaltung ist gut organisiert.                                                                                                                                                                                                                                                                                                                                                                                                                                                                     | trifft gar nicht zu <input type="checkbox"/> | trifft völlig zu <input type="checkbox"/> Frage ist nicht relevant <input type="checkbox"/> |
| Die Veranstaltung hat eine gute Gesamtstruktur ("Roter Faden").                                                                                                                                                                                                                                                                                                                                                                                                                                                | trifft gar nicht zu <input type="checkbox"/> | trifft völlig zu <input type="checkbox"/> Frage ist nicht relevant <input type="checkbox"/> |
| Es gab keine schweren Verspätungen oder Ausfälle.                                                                                                                                                                                                                                                                                                                                                                                                                                                              | trifft gar nicht zu <input type="checkbox"/> | trifft völlig zu <input type="checkbox"/> Frage ist nicht relevant <input type="checkbox"/> |
| <b>Lehrengagement der an der Lehrveranstaltung beteiligten Dozierenden</b>                                                                                                                                                                                                                                                                                                                                                                                                                                     |                                                                                                                                                                                                                                                                               |                                                                                             |
| Den beteiligten Lehrenden ist der Lernerfolg der Studierenden wichtig.                                                                                                                                                                                                                                                                                                                                                                                                                                         | trifft gar nicht zu <input type="checkbox"/> | trifft völlig zu <input type="checkbox"/> Frage ist nicht relevant <input type="checkbox"/> |
| Die beteiligten Lehrenden sind gut auf den Unterricht vorbereitet.                                                                                                                                                                                                                                                                                                                                                                                                                                             | trifft gar nicht zu <input type="checkbox"/> | trifft völlig zu <input type="checkbox"/> Frage ist nicht relevant <input type="checkbox"/> |
| Die Studierenden werden motiviert, sich aktiv mit den Lerninhalten auseinanderzusetzen.                                                                                                                                                                                                                                                                                                                                                                                                                        | trifft gar nicht zu <input type="checkbox"/> | trifft völlig zu <input type="checkbox"/> Frage ist nicht relevant <input type="checkbox"/> |
| <b>Lernziele und Lerninhalte der Lehrveranstaltung</b>                                                                                                                                                                                                                                                                                                                                                                                                                                                         |                                                                                                                                                                                                                                                                               |                                                                                             |
| Die gestellten Anforderungen sind adäquat.                                                                                                                                                                                                                                                                                                                                                                                                                                                                     | trifft gar nicht zu <input type="checkbox"/> | trifft völlig zu <input type="checkbox"/> Frage ist nicht relevant <input type="checkbox"/> |

[SURVEY]

- Die Lernziele der Lehrveranstaltung sind transparent.      trifft gar nicht zu       trifft völlig zu  Frage ist nicht relevant
- Die Relevanz der Lerninhalte wird deutlich.      trifft gar nicht zu       trifft völlig zu  Frage ist nicht relevant
- Ich habe in der Lehrveranstaltung viel gelernt.      trifft gar nicht zu       trifft völlig zu  Frage ist nicht relevant

**Didaktische Umsetzung**

- Die beteiligten Lehrenden können die Lehrveranstaltungsinhalte gut vermitteln.      trifft gar nicht zu       trifft völlig zu  Frage ist nicht relevant
- Die beteiligten Lehrenden gestalten den Unterricht anschaulich (mit praktischen Bezügen, Beispielen, etc.).      trifft gar nicht zu       trifft völlig zu  Frage ist nicht relevant
- Die begleitenden Unterrichtsmaterialien (Skripte, Präsentationen, etc.) sind lernförderlich.      trifft gar nicht zu       trifft völlig zu  Frage ist nicht relevant

**Gesamtbewertung der Lehrveranstaltung**

Wenn man alles in einer Note zusammenfassen könnte, würde ich der Veranstaltung die folgende Note (Schulnote von 1 bis 6) geben:       1     2     3     4     5     6

Zu optimieren wäre an der Veranstaltung (Mehrfachnennungen sind möglich):

- es besteht kein Handlungsbedarf
- Organisation, Struktur und Aufbau
- Methodik und Didaktik
- Veranstaltungsinhalte
- Sonstiges

**Lob, Kritik und Verbesserungsvorschläge**

Im Folgenden haben Sie die Möglichkeit, konkrete Verbesserungsvorschläge zu nennen (ggf. Bezug zu einzelnen Dozierenden nehmen).

Im Folgenden haben Sie die Möglichkeit, Lob zu äußern (ggf. Bezug zu einzelnen Dozierenden nehmen).

## 7.2 Evaluation zur Gesamtveranstaltung Integriertes Seminar Modul 6 – Pathobiochemie II: „Vom Gen zum Protein“

Der Fragebogen wurde im Papierformat am Ende der Präsenzphase II den Inverted Classroom Gruppen bereitgestellt.

|                                                    | Ja | Nein |
|----------------------------------------------------|----|------|
| Ich habe mich auf die Präsenzphase I vorbereitet.  |    |      |
| Ich habe mich auf die Präsenzphase II vorbereitet. |    |      |

1 = trifft **vollkommen** zu

5 = trifft **überhaupt nicht** zu

|                                                                                                                                                                                                                                                                                                                           | 1 | 2 | 3 | 4 | 5 |
|---------------------------------------------------------------------------------------------------------------------------------------------------------------------------------------------------------------------------------------------------------------------------------------------------------------------------|---|---|---|---|---|
| Die Einführungsveranstaltung (Präsenzphase 0) hat mich zur Vorbereitung auf die Präsenzphasen I und II motiviert.                                                                                                                                                                                                         |   |   |   |   |   |
| Die Vorbereitungsunterlagen waren gut strukturiert.                                                                                                                                                                                                                                                                       |   |   |   |   |   |
| Die Vorbereitungsunterlagen waren vom Umfang angemessen.                                                                                                                                                                                                                                                                  |   |   |   |   |   |
| Ich hätte auch alle drei Lehrfilme vor Präsenzphase I angesehen.                                                                                                                                                                                                                                                          |   |   |   |   |   |
| Die Vorbereitungsunterlagen haben mich zum Lernen motiviert.                                                                                                                                                                                                                                                              |   |   |   |   |   |
| Die Vorbereitungs- und Präsenzphasen waren inhaltlich gut aufeinander abgestimmt.                                                                                                                                                                                                                                         |   |   |   |   |   |
| Die Veranstaltungsinhalte sind für mein Medizinstudium relevant.                                                                                                                                                                                                                                                          |   |   |   |   |   |
| Insgesamt hat mich die Veranstaltung dazu motiviert, mich weiter mit den vermittelten Inhalten zu beschäftigen.                                                                                                                                                                                                           |   |   |   |   |   |
| Die Veranstaltung hat mein Interesse für die Biochemie gesteigert.                                                                                                                                                                                                                                                        |   |   |   |   |   |
| Durch die Veranstaltung wurde ich gut auf kommende Prüfungen vorbereitet.                                                                                                                                                                                                                                                 |   |   |   |   |   |
| Wenn ich die Veranstaltung mit anderen Seminaren vergleiche, dann habe ich durch den Einsatz der <i>Inverted Classroom</i> Methode zusätzliche Kompetenzen (wie z.B. Arbeiten im Team, ärztliche Kommunikation wie die Diskussion mit Fachkollegen oder das Erläutern von Sachverhalten gegenüber Fachfremden) trainiert. |   |   |   |   |   |
| Durch die klinischen und wissenschaftlichen Szenarien wurde mir die Relevanz des biochemischen Themas deutlich.                                                                                                                                                                                                           |   |   |   |   |   |

|                                                                                                                                                                      |  |  |  |  |  |
|----------------------------------------------------------------------------------------------------------------------------------------------------------------------|--|--|--|--|--|
| Wenn ich die Veranstaltung mit anderen vergleiche, dann muss ich durch den Einsatz der <i>Inverted Classroom</i> Methode weniger Zeit für Nachbearbeitung aufwenden. |  |  |  |  |  |
|----------------------------------------------------------------------------------------------------------------------------------------------------------------------|--|--|--|--|--|

Insgesamt gebe ich der Veranstaltung (Vorbereitungs- und Präsenzphase) folgende Schulnote:

1 (sehr gut)            2 (gut)            3 (befriedigend)            4 (ausreichend)            5 (mangelhaft)            6 (ungenügend)

Hier haben Sie die Möglichkeit, Lob und Kritik zu äußern:

### 7.3 Evaluationen zu den drei Pilotlehrfilmen SS2016 (*Inverted Classroom Gruppe*)

Der Fragebogen wurde im Papierformat am Ende der Präsenzphase II den *Inverted Classroom Gruppen* bereitgestellt.

|                                                                                                                                                   |  |  |
|---------------------------------------------------------------------------------------------------------------------------------------------------|--|--|
| Ich habe die Lehrfilme angesehen.                                                                                                                 |  |  |
| Die Lehrfilme waren als Vorbereitung auf die Präsenzzeit hilfreich.                                                                               |  |  |
| Ich würde mir diese Art der Lehrfilme begleitend gerne auch zu anderen Veranstaltungen (wie z.B. Biochemie Hauptvorlesung) der Biochemie ansehen. |  |  |

1 = trifft **vollkommen** zu

5 = trifft **überhaupt nicht** zu

|                                                                                   | 1 | 2 | 3 | 4 | 5 |
|-----------------------------------------------------------------------------------|---|---|---|---|---|
| Die Lehrfilme haben meine Motivation für das Seminar erhöht.                      |   |   |   |   |   |
| Die Lerninhalte waren gut strukturiert.                                           |   |   |   |   |   |
| Die Lehrfilme waren inhaltlich klar verständlich.                                 |   |   |   |   |   |
| Das inhaltliche Niveau war angemessen.                                            |   |   |   |   |   |
| Die Aufgaben zur Selbstlernkontrolle waren hilfreich, den Stoff zu durchdringen.  |   |   |   |   |   |
| Die Vorbereitungs- und Präsenzphasen waren inhaltlich gut aufeinander abgestimmt. |   |   |   |   |   |

Für die Lehrfilme gebe ich folgende Schulnote:

1 (sehr gut)                      2 (gut)                      3 (befriedigend)                      4 (ausreichend)                      5 (mangelhaft)                      6  
(ungenügend)

Hier haben Sie die Möglichkeit, Lob und Kritik zu äußern:



### 7.4 Evaluationen zu den drei Pilotlehrfilmen SS2016 (traditionelle Gruppe)

Der Fragebogen wurde online über Moodle für die Studierenden der traditionellen Gruppen bereitgestellt.

|                                                                                                                                                   | Ja | Nein |
|---------------------------------------------------------------------------------------------------------------------------------------------------|----|------|
| Die Lehrfilme wären als Vorbereitung auf das Integrierte Seminar „Pathobiochemie II: Vom Gen zum Protein“ hilfreich gewesen.                      |    |      |
| Ich würde mir diese Art der Lehrfilme begleitend gerne auch zu anderen Veranstaltungen (wie z.B. Biochemie Hauptvorlesung) der Biochemie ansehen. |    |      |

1 = trifft **überhaupt nicht** zu

5 = trifft **vollkommen** zu

|                                                               | 1 | 2 | 3 | 4 | 5 |
|---------------------------------------------------------------|---|---|---|---|---|
| Die Lehrfilme hätten meine Motivation für das Seminar erhöht. |   |   |   |   |   |
| Die Lerninhalte waren gut strukturiert klar verständlich.     |   |   |   |   |   |
| Das inhaltliche Niveau war angemessen.                        |   |   |   |   |   |

Für die Lehrfilme gebe ich folgende Schulnote:

1 (sehr gut)      2 (gut)      3 (befriedigend)      4 (ausreichend)      5 (mangelhaft)      6  
(ungenügend)

Hier haben Sie die Möglichkeit, Lob und Kritik zu äußern.
